# Supplementary material
Source: ML conference proceedings conference paper supplement (https://openreview.net/forum?id=t3vnnLeajU)
Supplement: supplementary_material [file attachment]

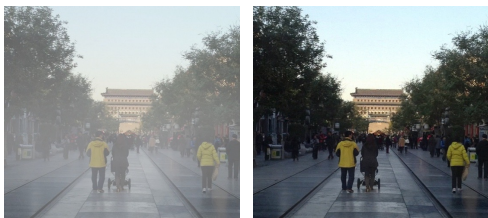

*Image dehazing*

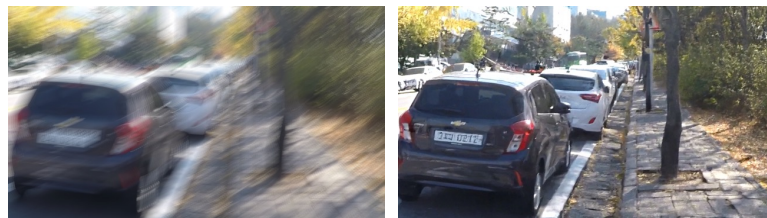

*Image deblurring*

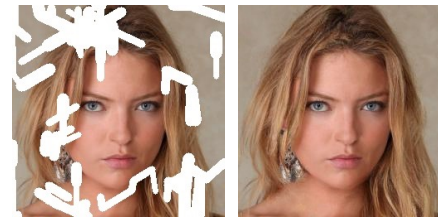

*Face inpainting*

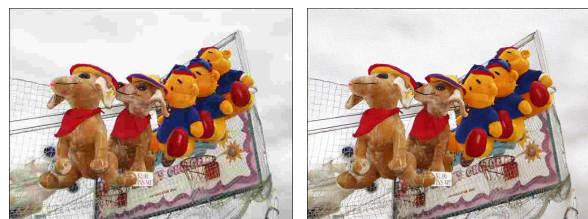

*JPEG artifact deduction*

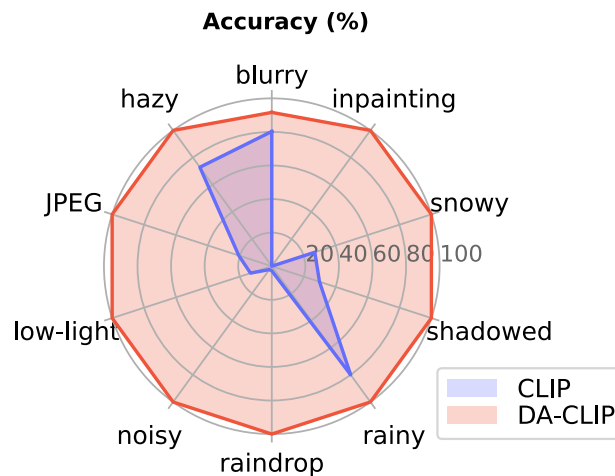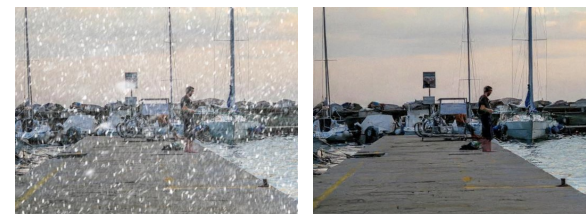

*Image desnowing*

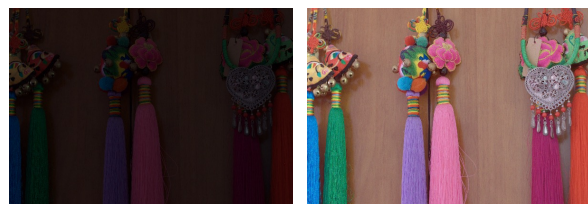

*Low-light image enhancement*

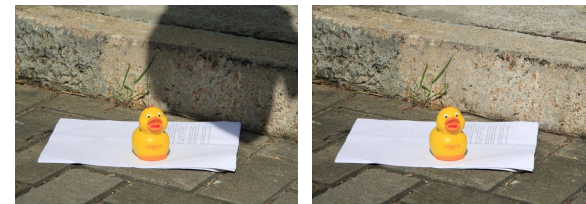

*Image shadow removal*

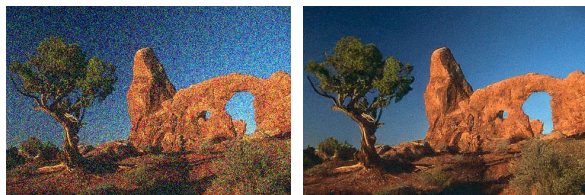

*Image denoising*

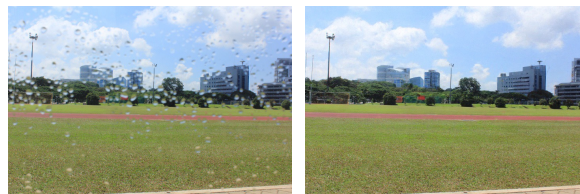

*Image raindrop removal*

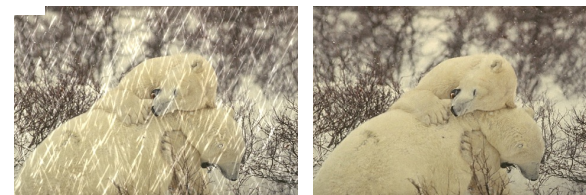

*Image deraining*
